# Supplementary material
Source: PubMed Central journal article supplement (PMC9220954)
Supplement: mmc1.pdf [file mmc1.pdf]

**Supplemental information**

**SARS-CoV-2 Omicron triggers cross-reactive  
neutralization and Fc effector functions in previously  
vaccinated, but not unvaccinated, individuals**

**Simone I. Richardson, Vimbai Sharon Madzorera, Holly Spencer, Nelia P. Manamela, Mieke A. van der Mescht, Bronwen E. Lambson, Brent Oosthuysen, Frances Ayres, Zanele Makhado, Thandeka Moyo-Gwete, Nonkululeko Mzindle, Thopisang Motlou, Amy Strydom, Adriano Mendes, Houriiyah Tegally, Zelda de Beer, Talita Roma de Villiers, Annie Bodenstein, Gretha van den Berg, Marietjie Venter, Tulio de Oliveira, Veronica Ueckermann, Theresa M. Rossouw, Michael T. Boswell, and Penny L. Moore**

**Table S1: Demographic and clinical description of the cohort, Related to STAR Methods**

| Study number | Age | Gender | Positive PCR test | Days sampled post infection | Vaccination status   | Days since vaccination | Sequence      | Severity | WHO severity scale |
|--------------|-----|--------|-------------------|-----------------------------|----------------------|------------------------|---------------|----------|--------------------|
| COV132       | 36  | Male   | 2021/11/28        | 9                           | Unvaccinated         | -                      | Not sequenced | Severe   | 6                  |
| COV140       | 29  | Female | 2021/12/09        | 1                           | Unvaccinated         | -                      | Not sequenced | Mild     | 2                  |
| COV145       | 17  | Female | 2021/12/03        | 3                           | Unvaccinated         | -                      | Omicron       | Mild     | 2                  |
| COV149       | 63  | Female | 2021/12/05        | 3                           | Unvaccinated         | -                      | Not sequenced | Mild     | 2                  |
| COV157       | 66  | Male   | 2021/12/04        | 4                           | Unvaccinated         | -                      | Omicron       | Moderate | 5                  |
| COV158       | 69  | Female | 2021/12/14        | 6                           | Unvaccinated         | -                      | Not sequenced | Moderate | 5                  |
| COV159       | 24  | Male   | 2021/11/25        | 6                           | Unvaccinated         | -                      | Not sequenced | Mild     | 2                  |
| COV162       | 58  | Male   | 2021/12/09        | 5                           | Unvaccinated         | -                      | Not sequenced | Moderate | 5                  |
| COV165       | 62  | Female | 2021/12/10        | 4                           | Unvaccinated         | -                      | Not sequenced | Moderate | 5                  |
| COV166       | 59  | Male   | 2021/12/10        | 4                           | Unvaccinated         | -                      | Not sequenced | Severe   | 6                  |
| COV167       | 62  | Female | 2021/11/29        | 8                           | Unvaccinated         | -                      | Not sequenced | Severe   | 5                  |
| COV176       | 75  | Male   | 2021/12/20        | 2                           | Unvaccinated         | -                      | Not sequenced | Moderate | 6                  |
| COV178       | 61  | Female | 2021/12/19        | 2                           | Unvaccinated         | -                      | Not sequenced | Moderate | 5                  |
| COV183       | 27  | Male   | 2021/12/12        | 2                           | Unvaccinated         | -                      | Not sequenced | Mild     | 2                  |
| COV184       | 59  | Male   | 2021/12/14        | 1                           | Unvaccinated         | -                      | Not sequenced | Moderate | 5                  |
| COV185       | 47  | Female | 2021/12/13        | 1                           | Unvaccinated         | -                      | Not sequenced | Moderate | 5                  |
| COV186       | 58  | Male   | 2021/12/03        | 10                          | Unvaccinated         | -                      | Omicron       | Moderate | 5                  |
| COV187       | 35  | Female | 2021/12/11        | 3                           | Unvaccinated         | -                      | Not sequenced | Mild     | 2                  |
| COV189       | 49  | Male   | 2021/12/09        | 5                           | Unvaccinated         | -                      | Not sequenced | Moderate | 5                  |
| COV190       | 34  | Female | 2021/12/10        | 4                           | Unvaccinated         | -                      | Omicron       | Mild     | 2                  |
| COV151       | 48  | Male   | 2021/12/07        | 1                           | One dose Ad26.CoV2.S | 56                     | Omicron       | Severe   | 5                  |
| COV182       | 39  | Male   | 2021/12/10        | 3                           | One dose Ad26.CoV2.S | Unknown                | Not sequenced | Mild     | 2                  |
| COV131       | 59  | Female | 2021/12/10        | 4                           | Two doses BNT162b2   | 109                    | Not sequenced | Severe   | 6                  |
| COV135       | 85  | Male   | 2021/11/26        | 5                           | Two doses BNT162b2   | 72                     | Omicron       | Mild     | 2                  |
| COV138       | 68  | Male   | 2021/11/25        | 5                           | Two doses BNT162b2   | Unknown                | Not sequenced | Moderate | 3                  |
| COV161       | 64  | Female | 2021/12/05        | 5                           | Two doses BNT162b2   | 112                    | Not sequenced | Mild     | 2                  |
| COV181       | 71  | Male   | 2021/12/16        | 4                           | Two doses BNT162b2   | 163                    | Not sequenced | Severe   | 6                  |

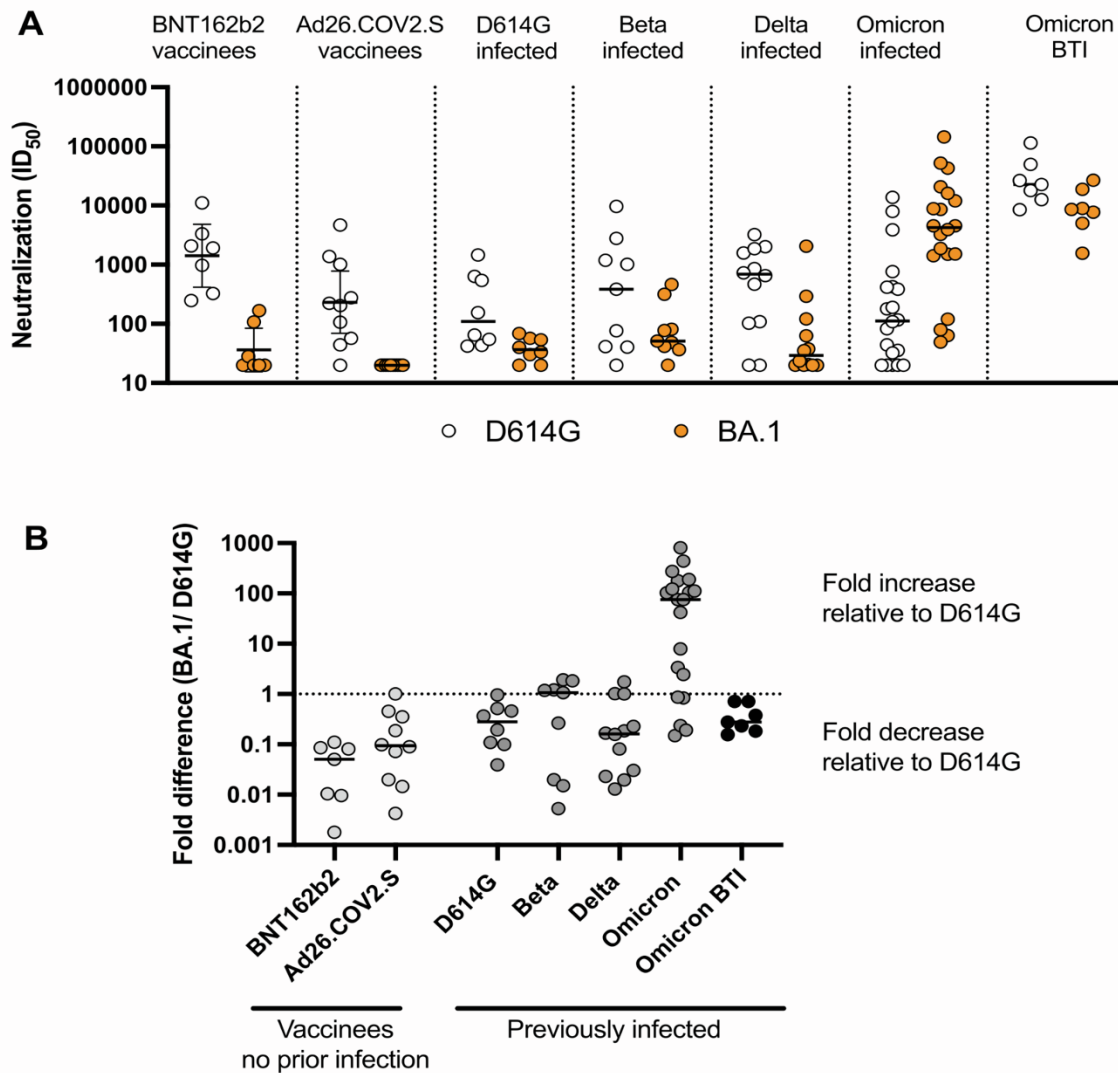

**Figure S1: Omicron BA.1 neutralization titers are substantially boosted in response to Omicron infection compared to infection with other VOCs or vaccination, Related to Figure 2**

(A) Neutralization ID<sub>50</sub> titers from vaccinees two months post two-doses of BNT162b2 or one-dose of Ad26.COVS, individuals acutely infected with D614G, Beta, Delta or Omicron or individuals who were vaccinated with either BNT162b2 or Ad26.COVS and then infected with Omicron (BTI = breakthrough infection) against D614G (white) and Omicron BA.1 (orange) SARS-CoV-2 variants. Lines indicate geometric mean titer (GMT). (B) Fold difference of neutralization titer against Omicron BA.1 relative to D614G for each individual is shown with median fold difference indicated by the bold line. The dotted line indicates no fold difference.
